# Supplementary material for: The Co-factor of LIM Domains (CLIM/LDB/NLI) Maintains Basal Mammary Epithelial Stem Cells and Promotes Breast Tumorigenesis
Source: PubMed Central journal article supplement (PMC4117441; doi:10.1371/journal.pgen.1004520), 2014-07-31

Figure S2

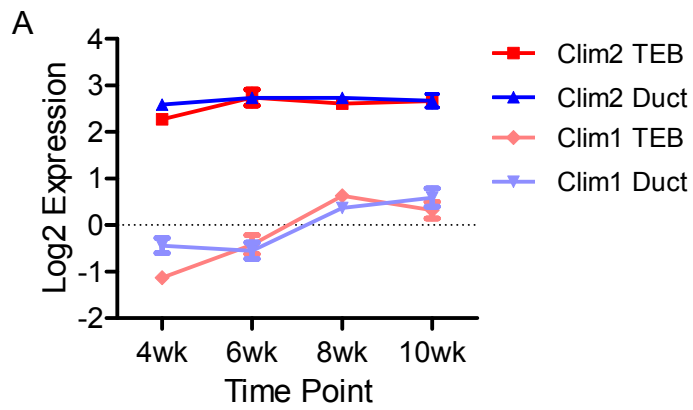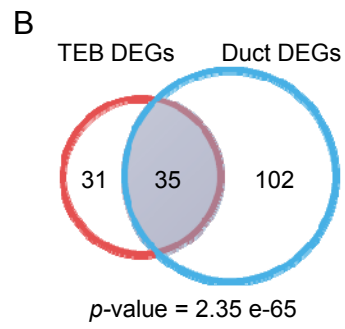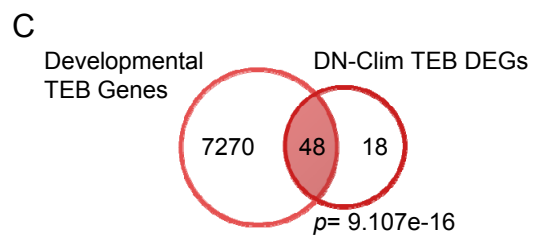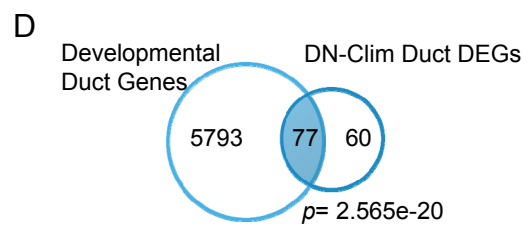

Supplement: pgen.1004520.s009.pdf [file pgen.1004520.s009.pdf]
